# Supplementary material
Source: PubMed Central journal article supplement (PMC3272886)
Supplement: NIHMS339088-supplement-2.pdf [file NIHMS339088-supplement-2.pdf]

a

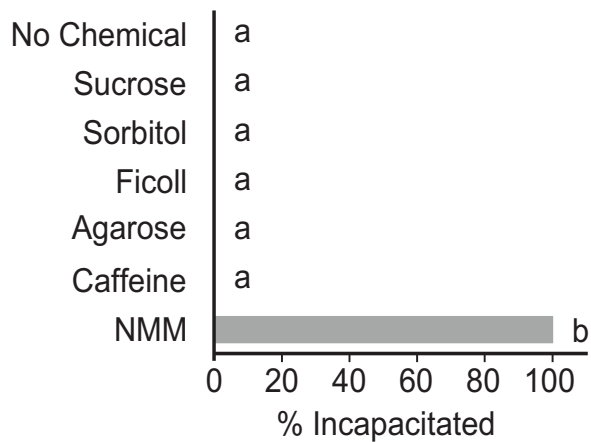

b

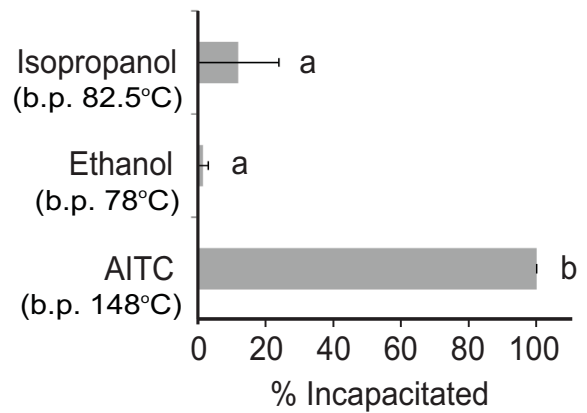

**Supplementary Figure 1: Reactive electrophiles cause incapacitation in *Drosophila*.** In all experiments, 15-30 flies were exposed to chemicals in 15 mL conical tubes. **a**, Solid chemicals were administered as ~50 mg powder for 5 min, tubes containing flies for testing were briefly vortexed to maximize exposure. "No Chemical" tubes were also vortexed as control. **b**, Undiluted Liquids were administered as ~50  $\mu$ L drop applied to KimWipes for 1 min. b.p.= boiling point. **a-b**,  $**\alpha=0.01$ , Tukey HSD. All data are mean  $\pm$  s.e.m. 15-30 flies/experiment, n=3 experiments/condition

Garrity\_SuppFig. 2

Electrolyte Only (30 mM Tricholine Citrate)

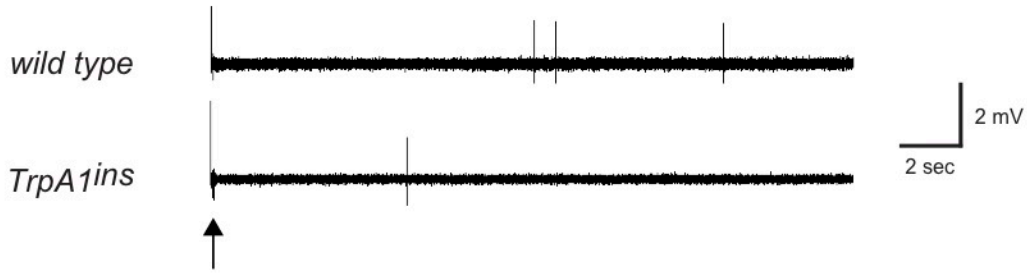

**Supplementary Figure 2: Example responses from labellar gustatory bristles to electrolyte-only solution in wild type and *Trpa1<sup>ins</sup>* mutants.** Responses from berberine-sensitive i-type bristles. Arrow: artifact caused by initial contact with bristle.

## Garrity\_SupFig. 3

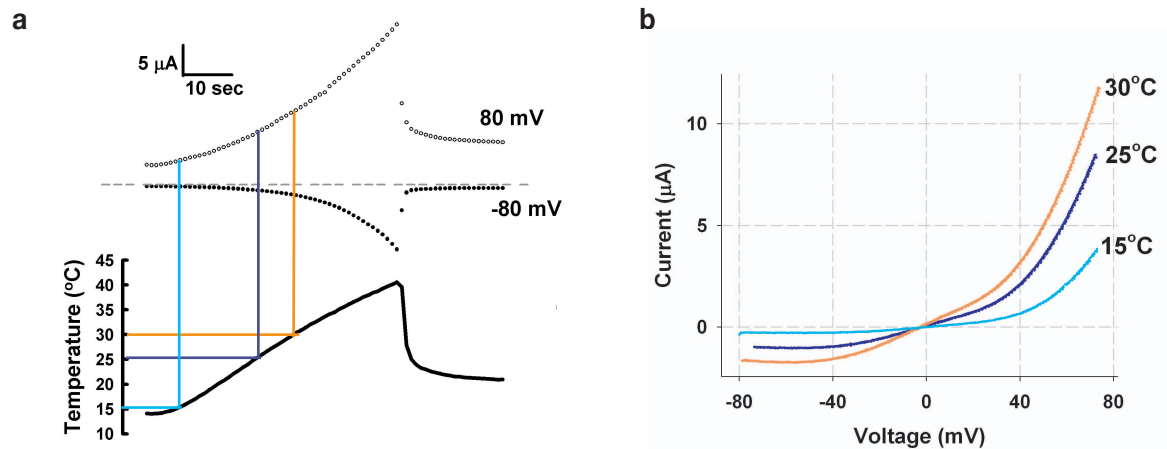

**Supplementary Figure 3. TRPA1(A) currents below and above the transition temperature show similar reversal potentials and voltage dependences.**

**a.** Temperature-dependent activity of TRPA1(A) at 80 and -80 mV in *Xenopus* oocytes. Voltage ramps between -80 and 80 mV were applied for 300 msec every second via two-electrode voltage clamp. Temperature was increased at  $\sim 0.5^\circ\text{C}/\text{sec}$ . *Light blue line* indicates current at  $15^\circ\text{C}$ , while *purple and orange lines* currents at 25 and  $30^\circ\text{C}$ , respectively.

**b.** Current-voltage relationships of TRPA1(A) activity at 15, 25 and  $30^\circ\text{C}$  marked in (a).

## Garrity\_SuppFig. 4

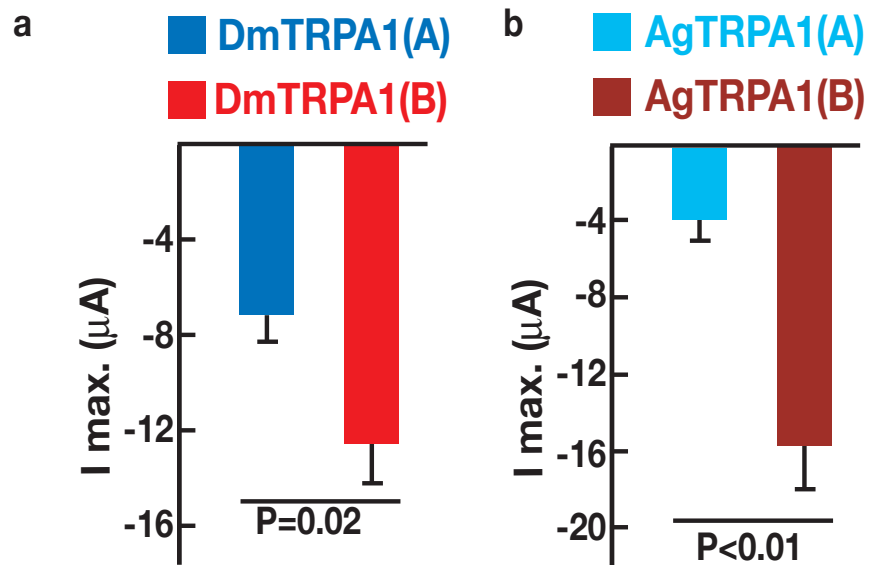

Supplementary Fig. 4. Comparison of maximum heat-responsive current amplitudes for wild type TRPA1(A) and TRPA1(B) channels from *Drosophila melanogaster* and *Anopheles gambiae*. a, b, Maximum TRPA1-dependent currents generated by temperature increase for *Drosophila* (a) and *Anopheles* (b) channels. Statistical comparisons by unpaired t-test

## Garrity\_SuppFig. 5

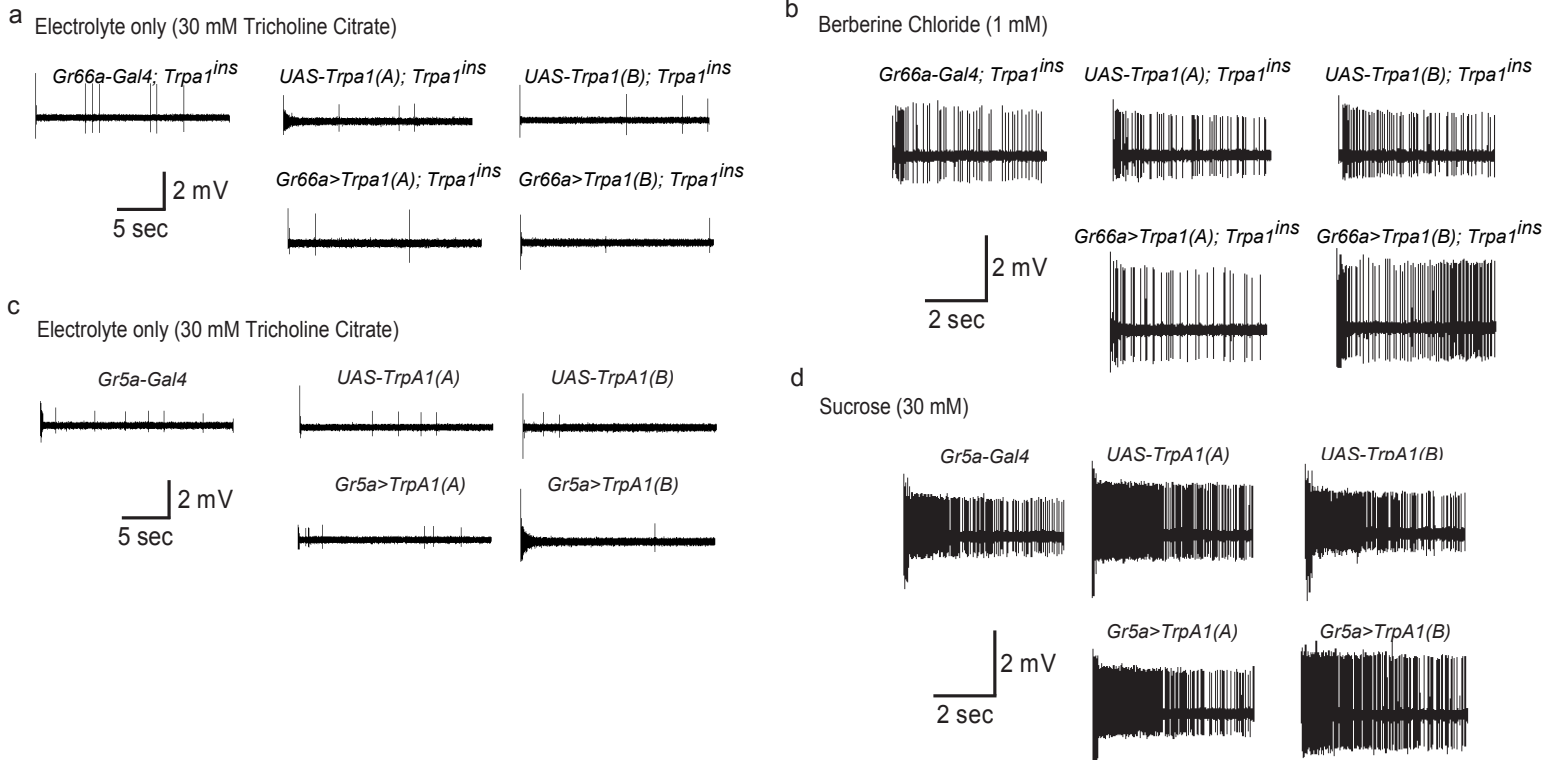

**Supplementary Figure 5: Example responses from labellar gustatory bristles for TRPA1 rescue and gain-of-function. a, b,** Responses of *Trpa1<sup>ins</sup>* mutant, berberine-sensitive i-type bristles expressing different TRPA1 isoforms. **a, c,** Typical responses of bristles to electrolyte-only solution (30 mM tricholine citrate). **b, d,** Typical responses to positive control solutions used to confirm preparation viability. Berberine-sensitive i-type bristles confirmed with 1 mM berberine chloride (**b**) and L-type bristles confirmed with 30 mM sucrose (**d**).

## Garrity\_SuppFig. 6

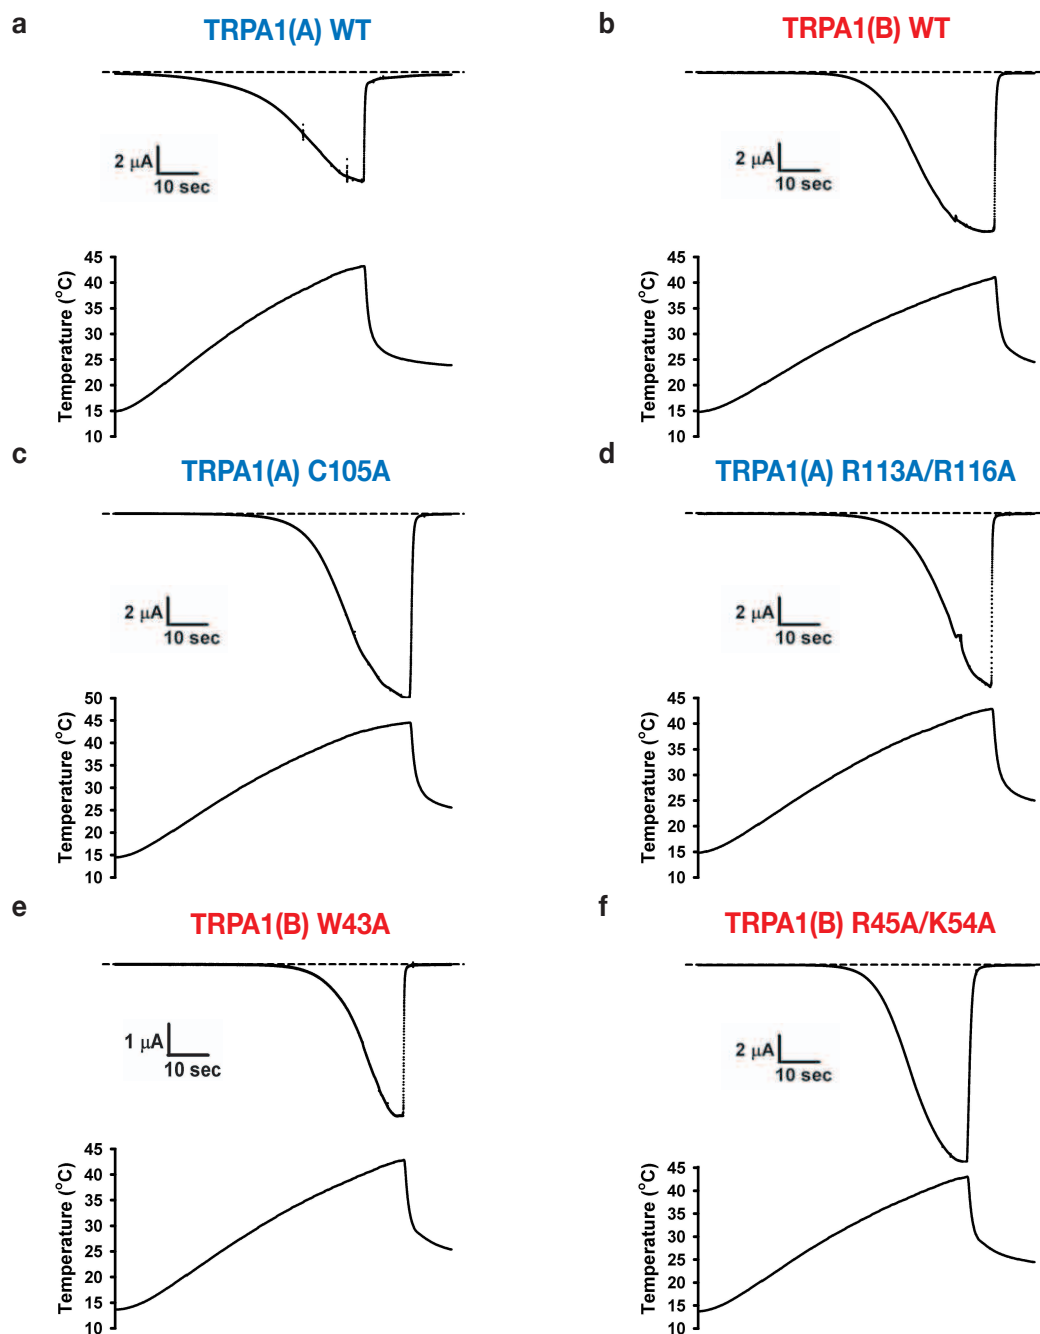

**Supplementary Figure 6. Representative current recordings of wild type TRPA1 isoforms and TRPA1(A) mutants.** Lower traces show temperature ramps from 15 to 45 $^{\circ}\text{C}$  ( $\sim 0.5^{\circ}\text{C}/\text{sec}$ ) applied to frog oocytes expressing TRPA1 channels as indicated. Currents were recorded at -60 mV held by two-electrode voltage clamp. **a-d.** The corresponding arrhenius plots are presented in Figure 4.

## Garrity\_SuppFig. 7

|                         | Imax (heat)   | Imax (NMM)    | Imax (heat)/Imax (NMM) |
|-------------------------|---------------|---------------|------------------------|
| TRPA1(A)<br>WT          | -7.3 +/- 1.1  | -20.3 +/- 2.1 | 0.36                   |
| TRPA1(A)<br>C105A       | -7.9 +/- 2.1  | -14.1 +/- 2.4 | 0.56                   |
| TRPA1(A)<br>R113A/R116A | -7.8 +/- 1.4  | -13.1 +/- 1.9 | 0.59                   |
| TRPA1(B)<br>WT          | -12.4 +/- 1.7 | -24.2 +/- 0.6 | 0.51                   |
| TRPA1(B)<br>W43A        | -3.7 +/- 0.4  | nd            | ---                    |
| TRPA1(B)<br>R45A/K54A   | -8.7 +/- 1.5  | nd            | ---                    |

**Supplementary Fig. 7. Comparison of maximum current responses for wild-type and mutant TRPA1 channels.** Maximum TRPA1-dependent currents generated by temperature increase and by 300  $\mu$ M NMM application in oocytes. For comparison to wild type channels, the heat responses of mutant channels that exhibited increased thermal sensitivity by Q10 (TRPA1(A)C105A and TRPA1(A) R113A/R116A) were normalized by dividing maximum heat responses by maximum NMM responses.

## Garrity\_SuppFig. 8

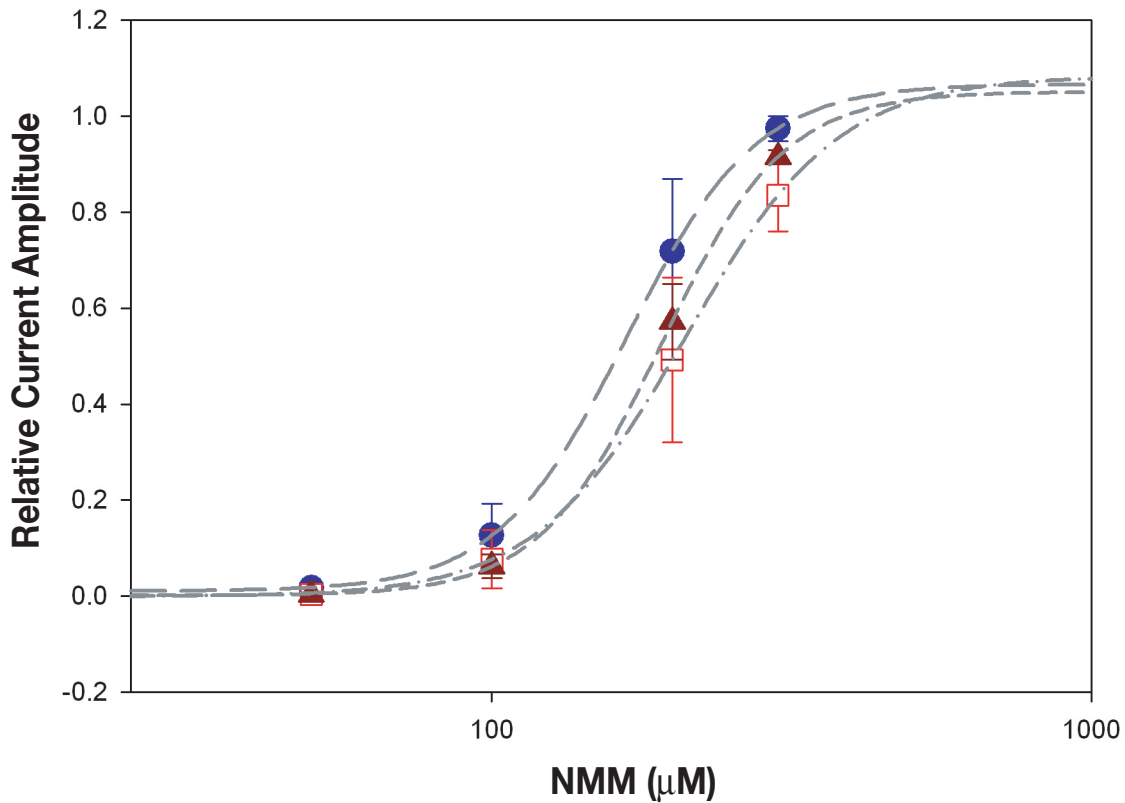

|                        | EC50 ( $\mu\text{M}$ ) | Hill Coefficient |
|------------------------|------------------------|------------------|
| ● TRPA1(A) WT          | 168 $\pm$ 21           | 4.0 $\pm$ 1.6    |
| □ TRPA1(A) C105A       | 211 $\pm$ 73           | 3.4 $\pm$ 2.6    |
| ▲ TRPA1(A) R113A/R116A | 192 $\pm$ 13           | 4.3 $\pm$ 1.3    |

### Supplementary Figure 8. NMM sensitivities of TRPA1(A) mutants are similar to that of wild type TRPA1(A).

A series of NMM concentrations from 50 to 300  $\mu\text{M}$  was applied to *Xenopus* oocytes expressing wild type and mutant forms of TRPA1(A). The data were collected following 1-min perfusion of each NMM concentration at -80 mV, and fitted to the Hill equation. All data are means; error bars indicate  $\pm$  SEM



## Garrity\_SuppFig. 9

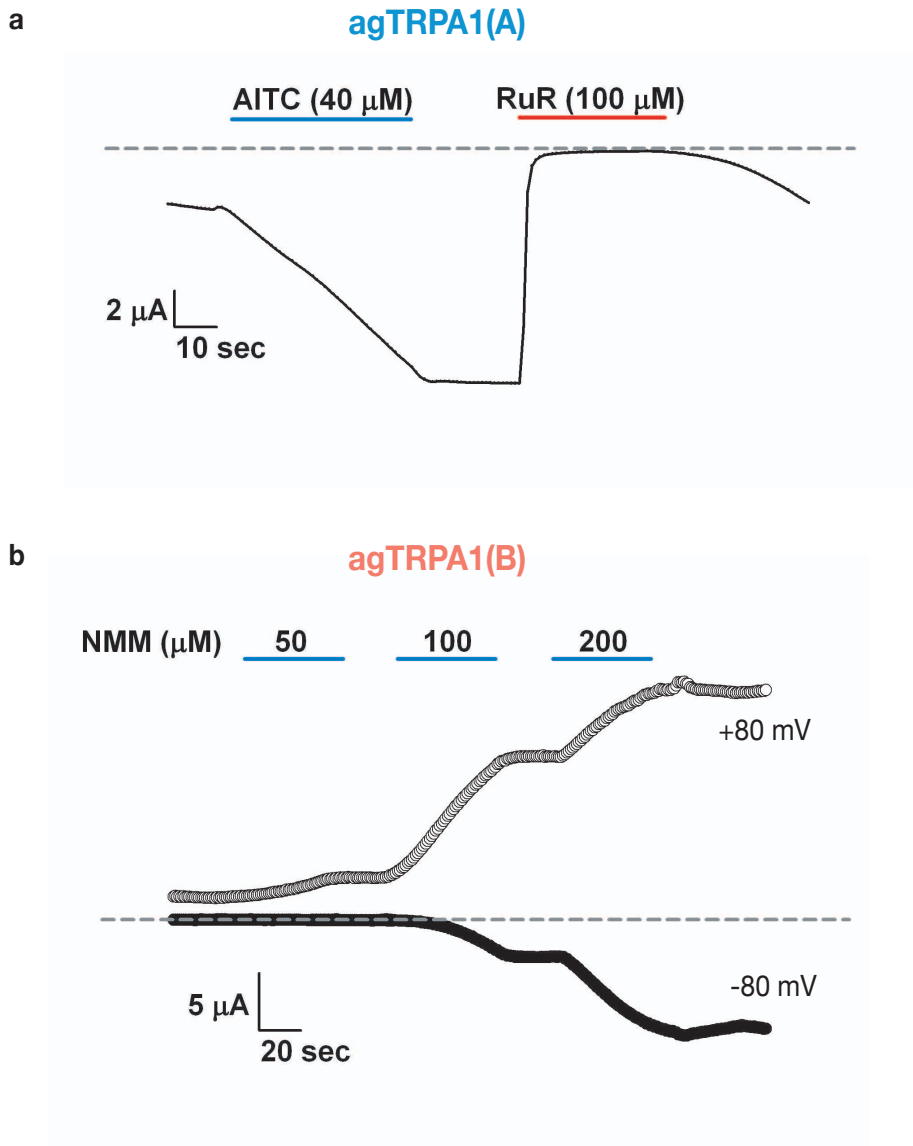

### Supplementary Figure 9. Both agTRPA1(A) and agTRPA1(B) robustly respond to reactive electrophiles.

**a.** A frog oocyte expressing agTRPA1(A) was perfused with 40  $\mu$ M allylisothiocyanate (AITC) for 1 min, and washed for 30 sec. Subsequently, the AITC-evoked current was blocked by 100  $\mu$ M ruthenium red (RuR). The current was recorded at -60 mV held by two-electrode voltage clamp (TEVC).

**b.** Three concentrations of NMM from 50 to 200  $\mu$ M were sequentially exposed to a oocyte expressing agTRPA1(B) with 30 sec washing intervals as indicated. Currents were recorded while 300 msec-voltage swipes between -80 and 80 mV were applied every second via TEVC.

# Garrity\_SuppFig. 10

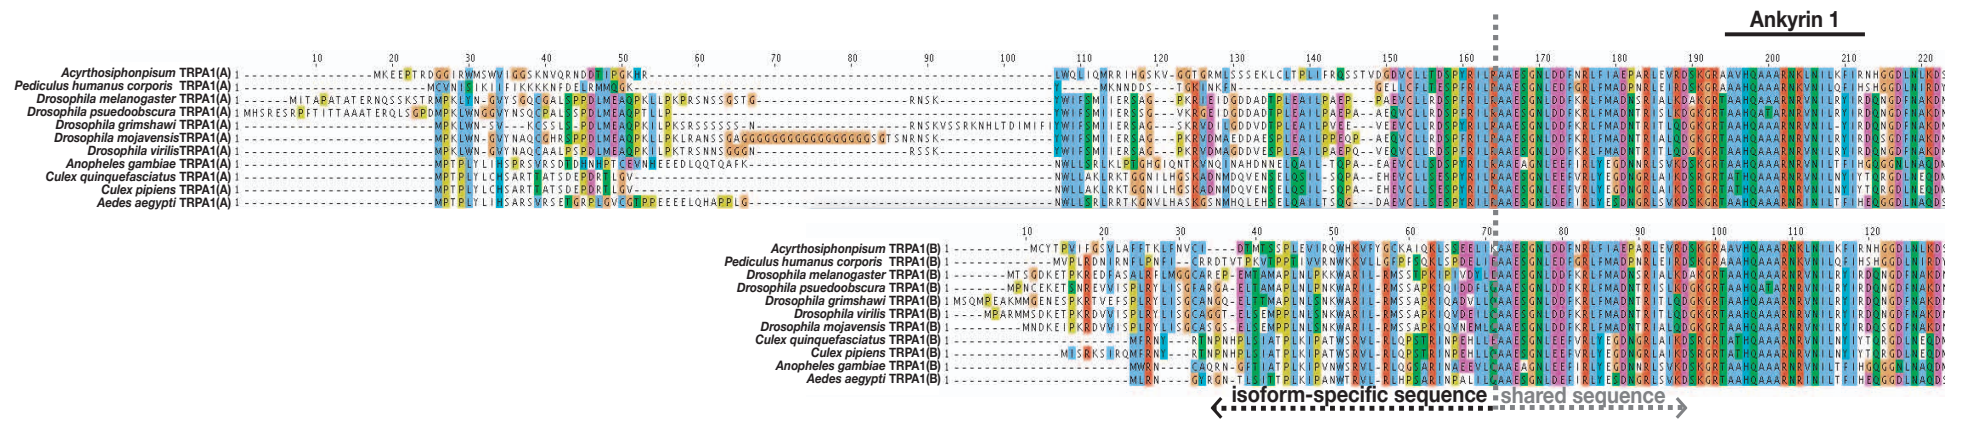

Supplementary Figure 10. Conservation of TRPA1 diversity in insect pests. Multiple sequence alignments of insect TRPA1 isoforms. Position of ankyrin repeat #1 in TRPA1 is noted.
